# Supplementary material
Source: PubMed Central journal article supplement (PMC7659037)
Supplement: ma0c01846_si_001.pdf [file ma0c01846_si_001.pdf]

# Supporting Information

## Short Time Dynamics of PDMS-g-PDMS Bottlebrush Polymer Melts Investigated by Quasi-Elastic Neutron Scattering

Karin J. Bichler<sup>1\*</sup>, Bruno Jakobi<sup>2</sup>, Victoria García Sakai<sup>3</sup>, Alice Klapproth<sup>4</sup>, Richard A. Mole<sup>4</sup>,  
Gerald J. Schneider<sup>1,2\*</sup>

<sup>1</sup> Department of Physics & Astronomy, Louisiana State University, Baton Rouge, Louisiana 70803, United States

<sup>2</sup> Department of Chemistry, Louisiana State University, Baton Rouge, Louisiana 70803, United States

<sup>3</sup> ISIS Facility, Rutherford Appleton Laboratory, Harwell Science and Innovation Campus, Chilton, Didcot, OX11 0QX, United Kingdom

<sup>4</sup> Australian Nuclear Science and Technology Organisation, New Illawarra Road, Lucas Heights, 2234, NSW, Australia

**Intermediate scattering function,  $S(Q,t)$ , as a function of time,  $t$ , for the sample with  $M_n^{side\ chain} = 298$  g/mol at low temperatures**

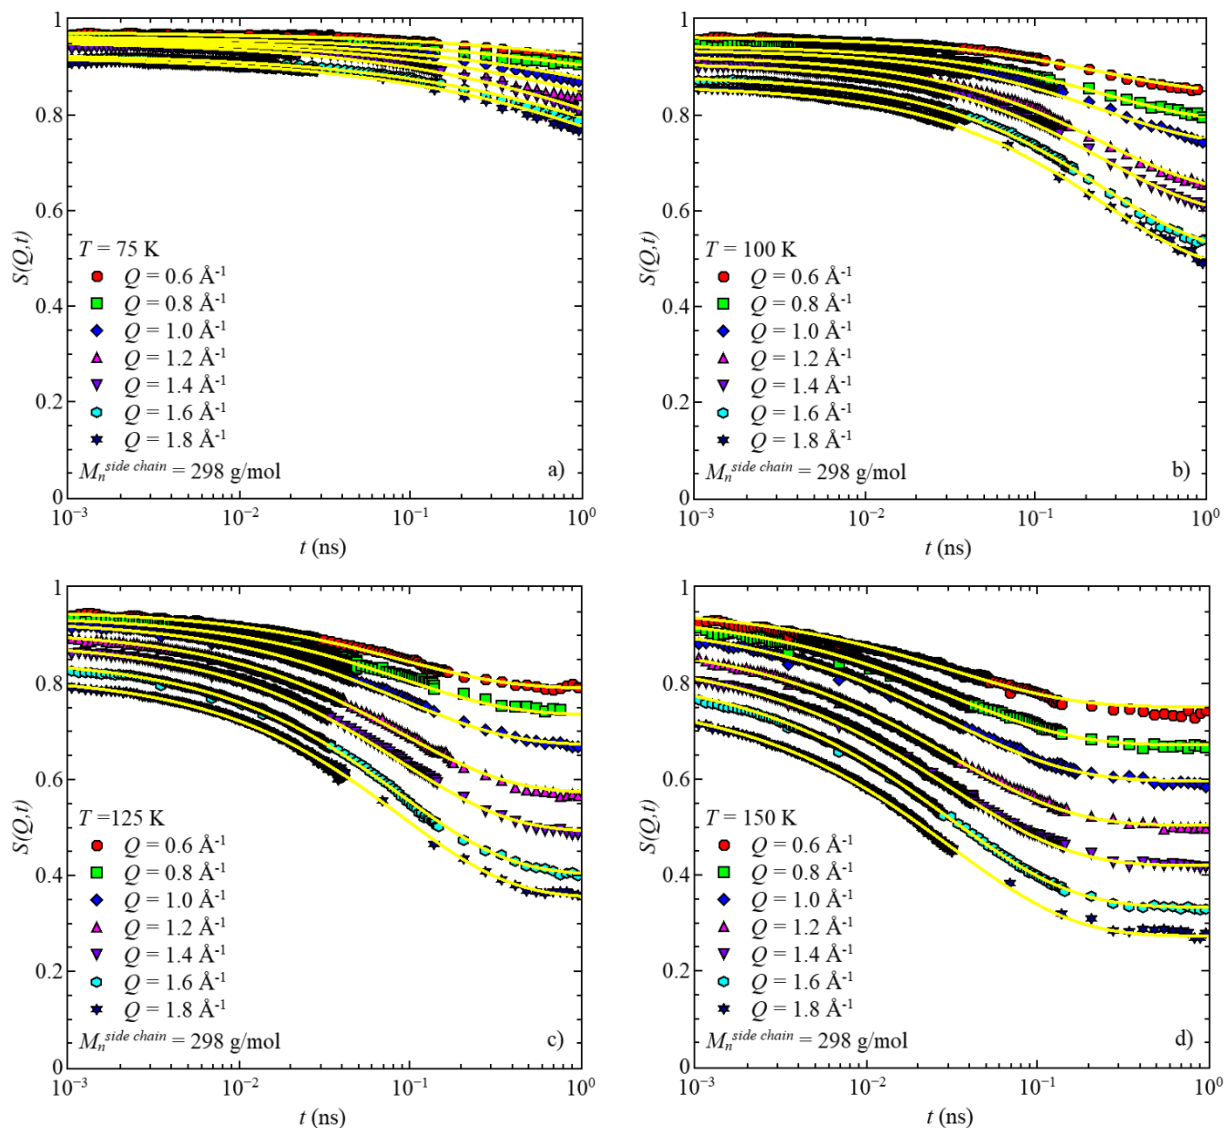

Figure S1: Intermediate scattering function,  $S(Q,t)$ , vs. time,  $t$ , for the sample with  $M_n^{side\ chain} = 298$  g/mol for four different temperatures. a)  $T = 75$  K, b)  $T = 100$  K, c)  $T = 125$  K, and d)  $T = 150$  K. Solid lines represent the data description with the model function for low temperatures, equation (3).

**Intermediate scattering function,  $S(Q,t)$ , as a function of time,  $t$ , for the sample with  $M_n^{side\ chain} = 298\text{ g/mol}$  at high temperatures**

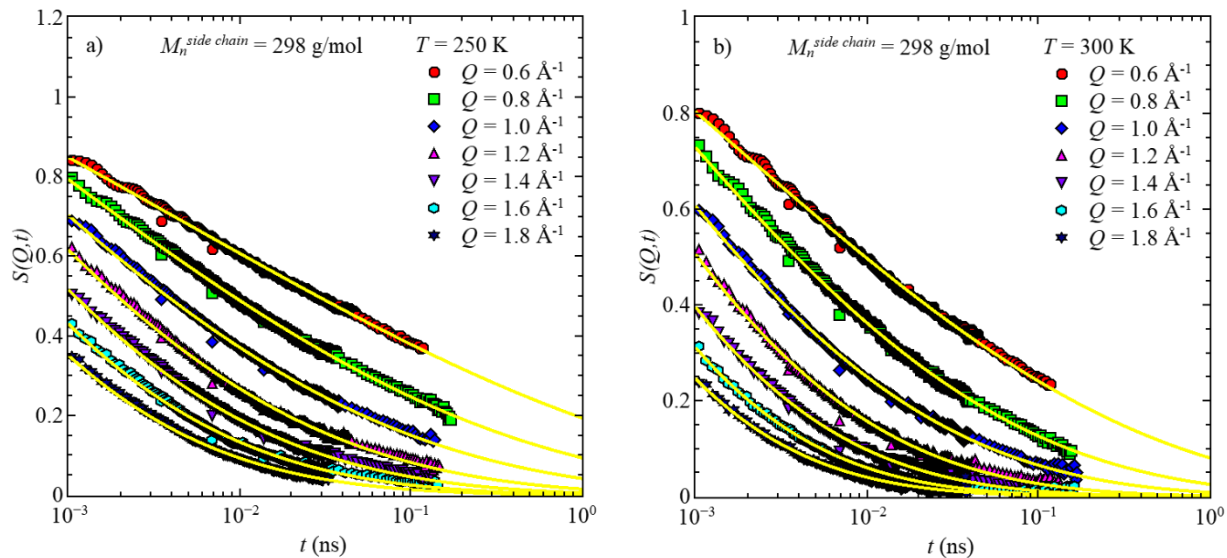

Figure S2: Intermediate scattering function,  $S(Q,t)$ , vs. time,  $t$ , for the sample with  $M_n^{side\ chain} = 298\text{ g/mol}$  for two temperatures, a)  $T = 250\text{ K}$  and b)  $T = 300\text{ K}$ . Solid lines represent the data description with the model function for high temperatures, equation (5).

*Intermediate scattering function,  $S(Q,t)$ , as a function of time,  $t$ , for the sample with  $M_n^{side\ chain} = 1800$  g/mol at low temperatures*

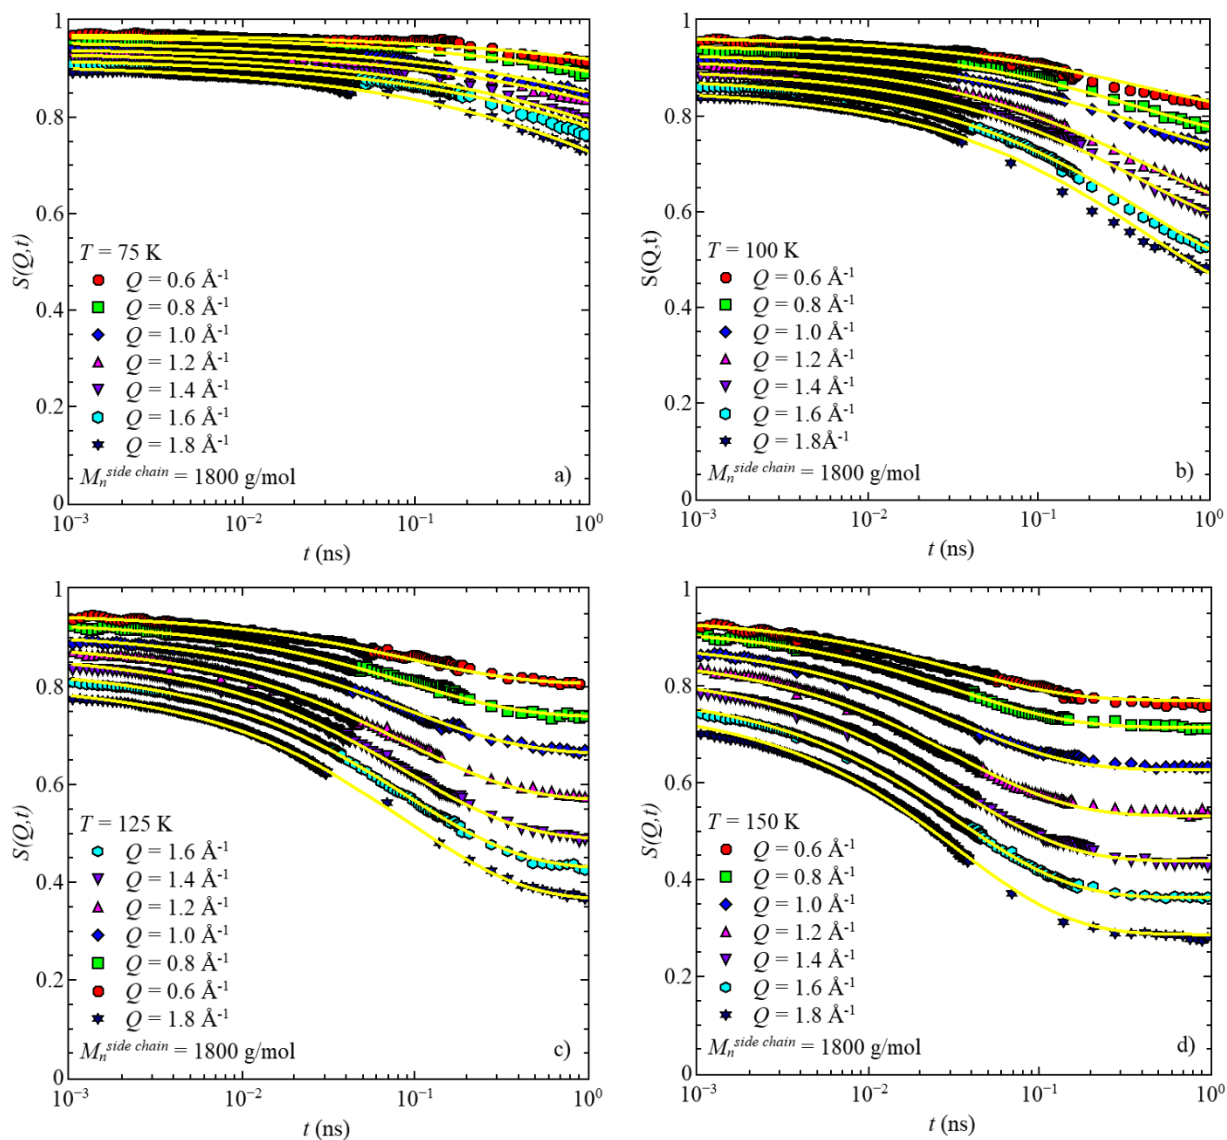

Figure S3: Intermediate scattering function,  $S(Q,t)$ , vs. time,  $t$ , for the sample with  $M_n^{side\ chain} = 1800$  g/mol for four different temperatures. a)  $T = 75$  K, b)  $T = 100$  K, c)  $T = 125$  K, and d)  $T = 150$  K. Solid lines represent the data description with the model function for low temperatures, equation (3).

**Intermediate scattering function,  $S(Q,t)$ , as a function of time,  $t$ , for the sample with  $M_n^{side\ chain} = 1800$  g/mol at high temperatures**

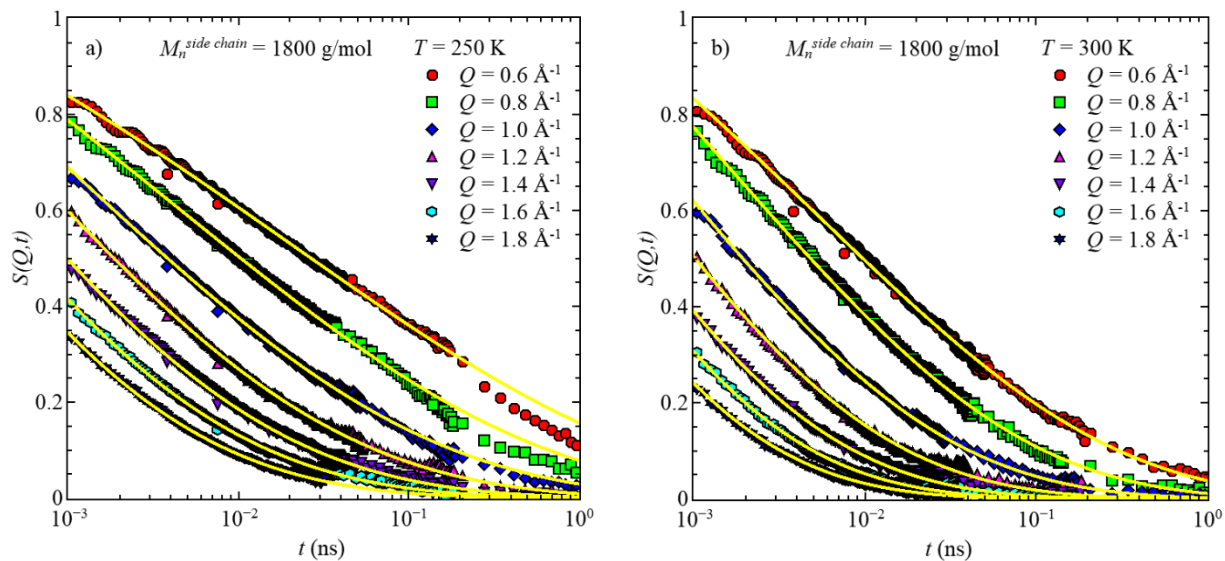

Figure S4: Intermediate scattering function,  $S(Q,t)$ , vs. time,  $t$ , for the sample with  $M_n^{side\ chain} = 1800$  g/mol for two temperatures, a)  $T = 250$  K and b)  $T = 300$  K. Solid lines represent the data description with the model function for high temperatures, equation (5).

*Elastic incoherent structure factor, EISF, as a function of momentum transfer, Q*

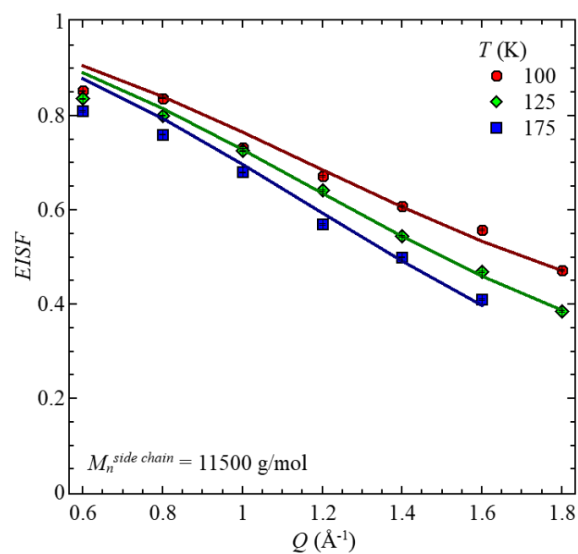

Figure S5: Elastic incoherent structure factor,  $EISF$ , vs. momentum transfer,  $Q$ , for three selected temperatures,  $T = 100$  K,  $T = 125$  K, and  $T = 175$  K for the PDMS-g-PDMS bottlebrush polymer with  $M_n^{side\ chain} = 11500$  g/mol as an example for all three samples. Solid lines are the best description with the equation (7).

*Stretching parameter,  $\beta_\ell$ , as a function of temperature,  $T$*

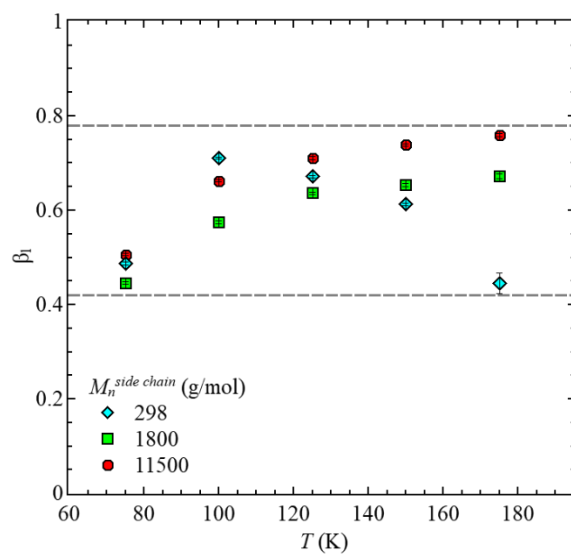

Figure S6: Stretching parameter,  $\beta_\ell$ , vs. temperature,  $T$ , for the methyl group dynamics.
